# Supplementary material for: Alternative service models for delivery of healthcare services in high-income countries: a scoping review of systematic reviews
Source: PubMed Central journal article supplement — BMJ Open. 2019 Jan 29;9(1):e024385. doi: 10.1136/bmjopen-2018-024385 (PMC6352783; doi:10.1136/bmjopen-2018-024385), 2019-01-29
Supplement: bmjopen-2018-024385supp001.pdf [file bmjopen-2018-024385supp001.pdf]

## PDQ search strategy

PDQ-Evidence is a database of evidence for decisions about health systems derived from the Epistemonikos database of systematic reviews. It includes the following databases: Cochrane Database of Systematic Reviews (CDSR), Database of Abstracts of Reviews of Effectiveness (DARE), MEDLINE via PubMed, EMBASE, CINAHL, PsycINFO, Latin American and Caribbean Health Sciences Literature (LILACS), JBI Database of Systematic Reviews and Implementation Reports, Evidence for Policy and Practice Information and Co-ordinating Centre (EPPI-Centre) Evidence Library, and the Campbell Collaboration online library. The 'intervention' publication filter will be used to exclude systematic reviews of non-intervention studies.

The following provides an overview of how the search for the scoping review on alternative service models for delivery of healthcare services in high-income countries.

1. On the navigation page of PDQ-Evidence, advanced search was entered.

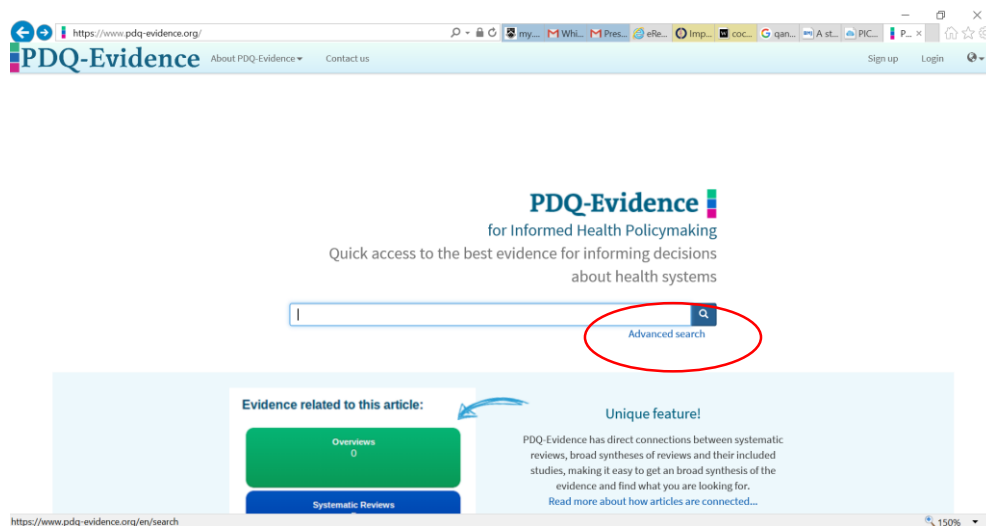

2. In the query box, an \* was entered into the Query box, and then Search. This filtered for all English language articles on PDQ.

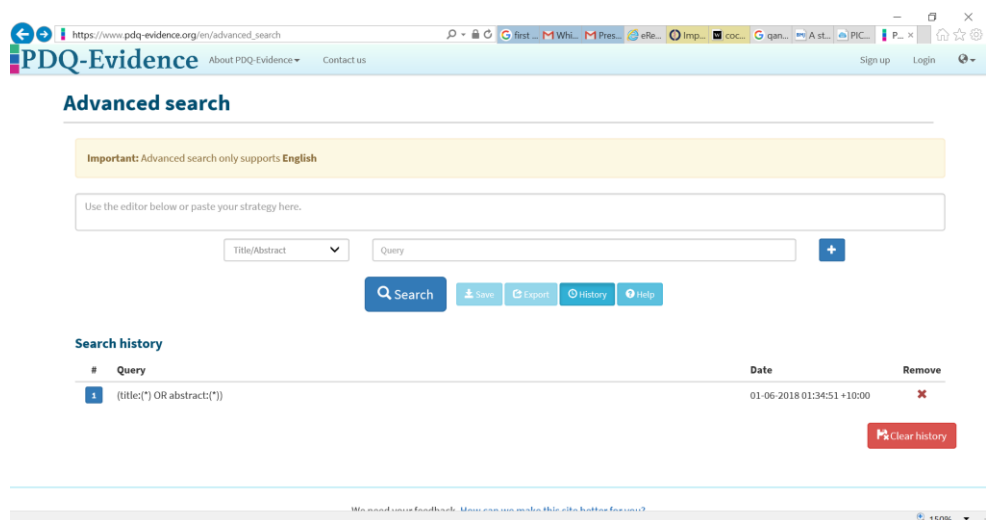

3. On the left hand side of the screen, results were then filtered for the following:

Custom year: 2012 to 2017 (search date 20<sup>th</sup> September, 2017), so date range was 01/01/2012 to 20/09/2017

Added to data base: All

Publication type: Systematic Review

Cochrane Review: All

Pubmed central (PMC): All

Systematic Review Question: Interventions

Type of meta-analysis: All

Country or regional focus: leave blank

The screenshot displays the PDQ-Evidence website's advanced search interface. On the left, a 'Filters' sidebar contains several dropdown menus, each with a red circle around it: 'Publication year' (set to 'Custom year range' with 'From:' 2012 and 'To:' 2017), 'Added to database' (set to 'All'), 'Publication type' (set to 'Systematic Review'), 'Cochrane review' (set to 'All'), 'Pubmed central (PMC)' (set to 'All'), 'Systematic Review Question' (set to 'Interventions'), 'Type of meta-analysis' (set to 'All'), and 'Country or regional focus' (set to 'All'). The main content area shows search results for the query '(title:(\*) OR abstract:(\*))'. Two results are visible: 1) 'Mobile phone messaging for communicating results of medical investigations' (Systematic review, 2012, Cochrane Database of Systematic Reviews), and 2) 'Chronic Care Model Decision Support and Clinical Information Systems interventions for people living with HIV: a systematic review' (Systematic review, 2013, Journal of general internal medicine). The right sidebar contains tabs for 'Abstract', 'About this article', and 'Related evidence', with the 'Abstract' tab selected. The abstract text is visible under the 'BACKGROUND:' heading.

No other restrictions were made to the search. This search yielded 829 results.
